# Supplementary material
Source: PubMed Central journal article supplement (PMC4689732)
Supplement: NIHMS745390-supplement-supplemental_figure.pdf [file NIHMS745390-supplement-supplemental_figure.pdf]

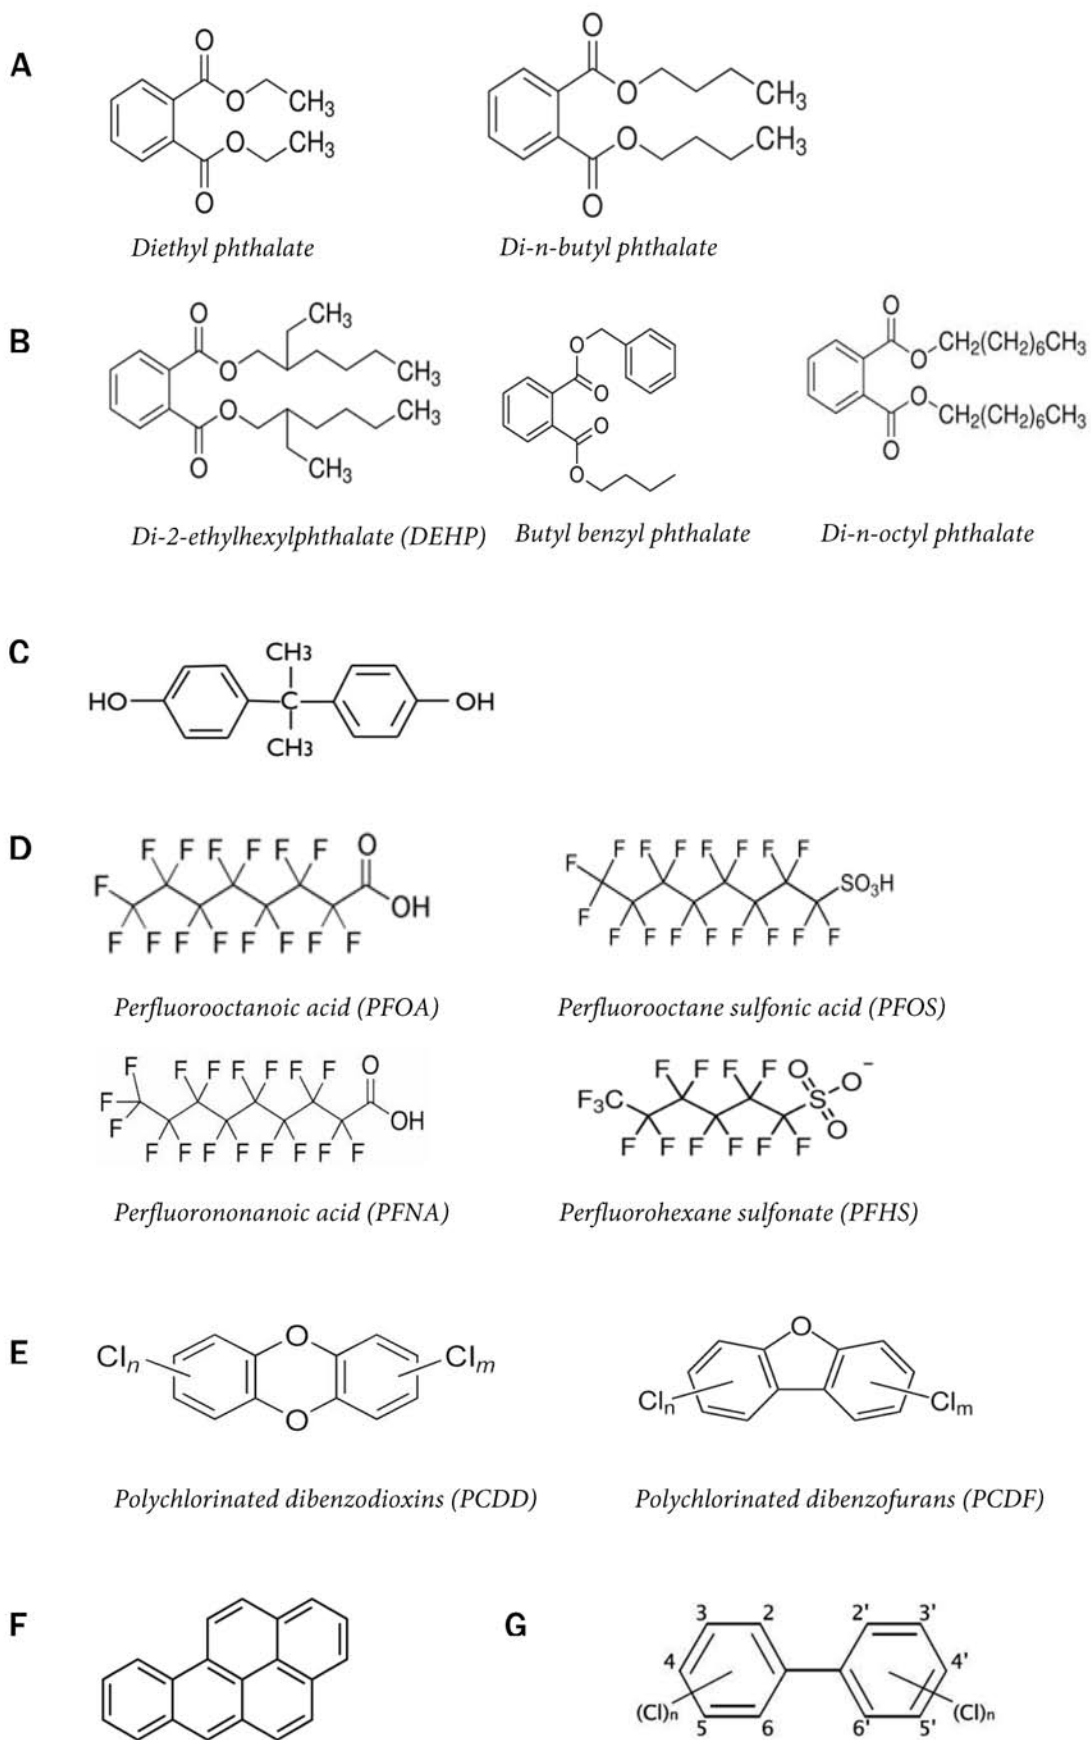

**Figure 1** | Molecular structures of environmental chemicals. **a** | Low molecular weight phthalates. **b** | High molecular weight phthalates. **c** | Molecular structure of bisphenol A (BPA). **d** | Molecular structures of common perfluoroalkyl acids (PFAAs). **e** | General structures of polychlorinated dibenzodioxins (PCDDs) and polychlorinated dibenzofurans (PCDFs). **f** | Benzo[a]pyrene, an important PAH. **g** | General structure of polychlorinated biphenyls (PCBs).
